# Supplementary material for: Prevalence and Cellular Distribution of Novel Immune Checkpoint Targets Across Longitudinal Specimens in Treatment-naïve Melanoma Patients: Implications for Clinical Trials
Source: Oxford University Press journal article supplement (doi:10.1158/1078-0432.ccr-18-4011), 2019-02-18
Supplement: 10780432ccr184011-sup-213505_2_supp_5330296_pmqhrd.xlsx [file 10780432ccr184011-sup-213505_2_supp_5330296_pmqhrd.xlsx]

## Sheet: Table 5
Supplementary Table 5. Cell suface antibodies used in CyTOF
	Label	Specificity	Clone	Manufacturer
	89	CD8A	RPA-T8	Biolegend
	104	CD45	HI30	BD
	110	CD45	HI30	BD
	113	CD56	REA196	Miltenyi Biotech
	115	CD11c	Bu16	Biolegend
	139	CD206	2018-02-15	Biolegend
	141	CD27	M-T271	BD
	142	CD19	HIB19	BD
	143	CD45RA	HI100	BD
	144	CD69	FN50	Biolegend
	145	CD4	RPA-T4	BD
	146	CD1c	L161	Biolegend
	147	CD45RO	UCHL1	BD
	148	CD16	3GB	BD
	149	CD366 (TIM3)	7D3	BD
	150	Biotin	1D4-C5	Biolegend
	151	CD278 (ICOS)	DX29	BD
	152	CD13	WM15	Fluidigm*
	154	CD3	UCHT1	BD
	156	CD86	IT2.2	BD
	158	CD33	WM53	BD
	159	CD197 (CCR7)	G043H7	Biolegend
	161	CD141 (BDCA3)	AD5-14H12	Miltenyi Biotech
	163	CD223 (Lag3)	11C3C65	BD
	164	CD274 (PD-L1)	MIH1	Biolegend
	165	PE	PE001	Biolegend
	166	TIGIT	MBSA43	RIZO
	167	APC	APC003	Biolegend
	168	CD273 (PD-L2)	24F.10C12	Biolegend
	169	CD25	M-A251	BD
	170	CD152 (CTLA-4)	14D3	eBiosciences
	172	CD134 (OX40)	ACT35	Biolegend
	173	CD14	M5E2	Biolegend
	174	HLA-DR	G46-6	BD
	175	CD279 (PD-1)	EH12.1H7	Biolegend
	176	CD127	A019D5	BD
	209	CD57	NK-1	BD
	* Fluidigm antibodies purchased metal conjugated. Remainder antibodies were conjugated in-house.

## Sheet: Table 6
Supplementary Table 6: Intracellular antibodies used in CyTOF
	Label	Specificity	Clone	Manufacturer
	153	CD68	KP1	Biolegend
	155	EOMES	WD1928	eBiosciences
	160	T-bet	4B10	Biolegend
	162	FoxP3	PCH101	eBiosciences

## Sheet: Table 7
Supplementary Table 7. Fluorophore-conjugated Cell Surface antibodies
	Label	Specificity	Clone	Manufacturer
	Biotin	CD103	Ber-ACT8	Biolegend
	PE	CD357 (GITR)	621	Biolegend
