# Supplementary figures and images for: Prevalence and Cellular Distribution of Novel Immune Checkpoint Targets Across Longitudinal Specimens in Treatment-naïve Melanoma Patients: Implications for Clinical Trials
Source: Oxford University Press journal article supplement (doi:10.1158/1078-0432.ccr-18-4011), 2019-02-18

Supplementary Figure 3A

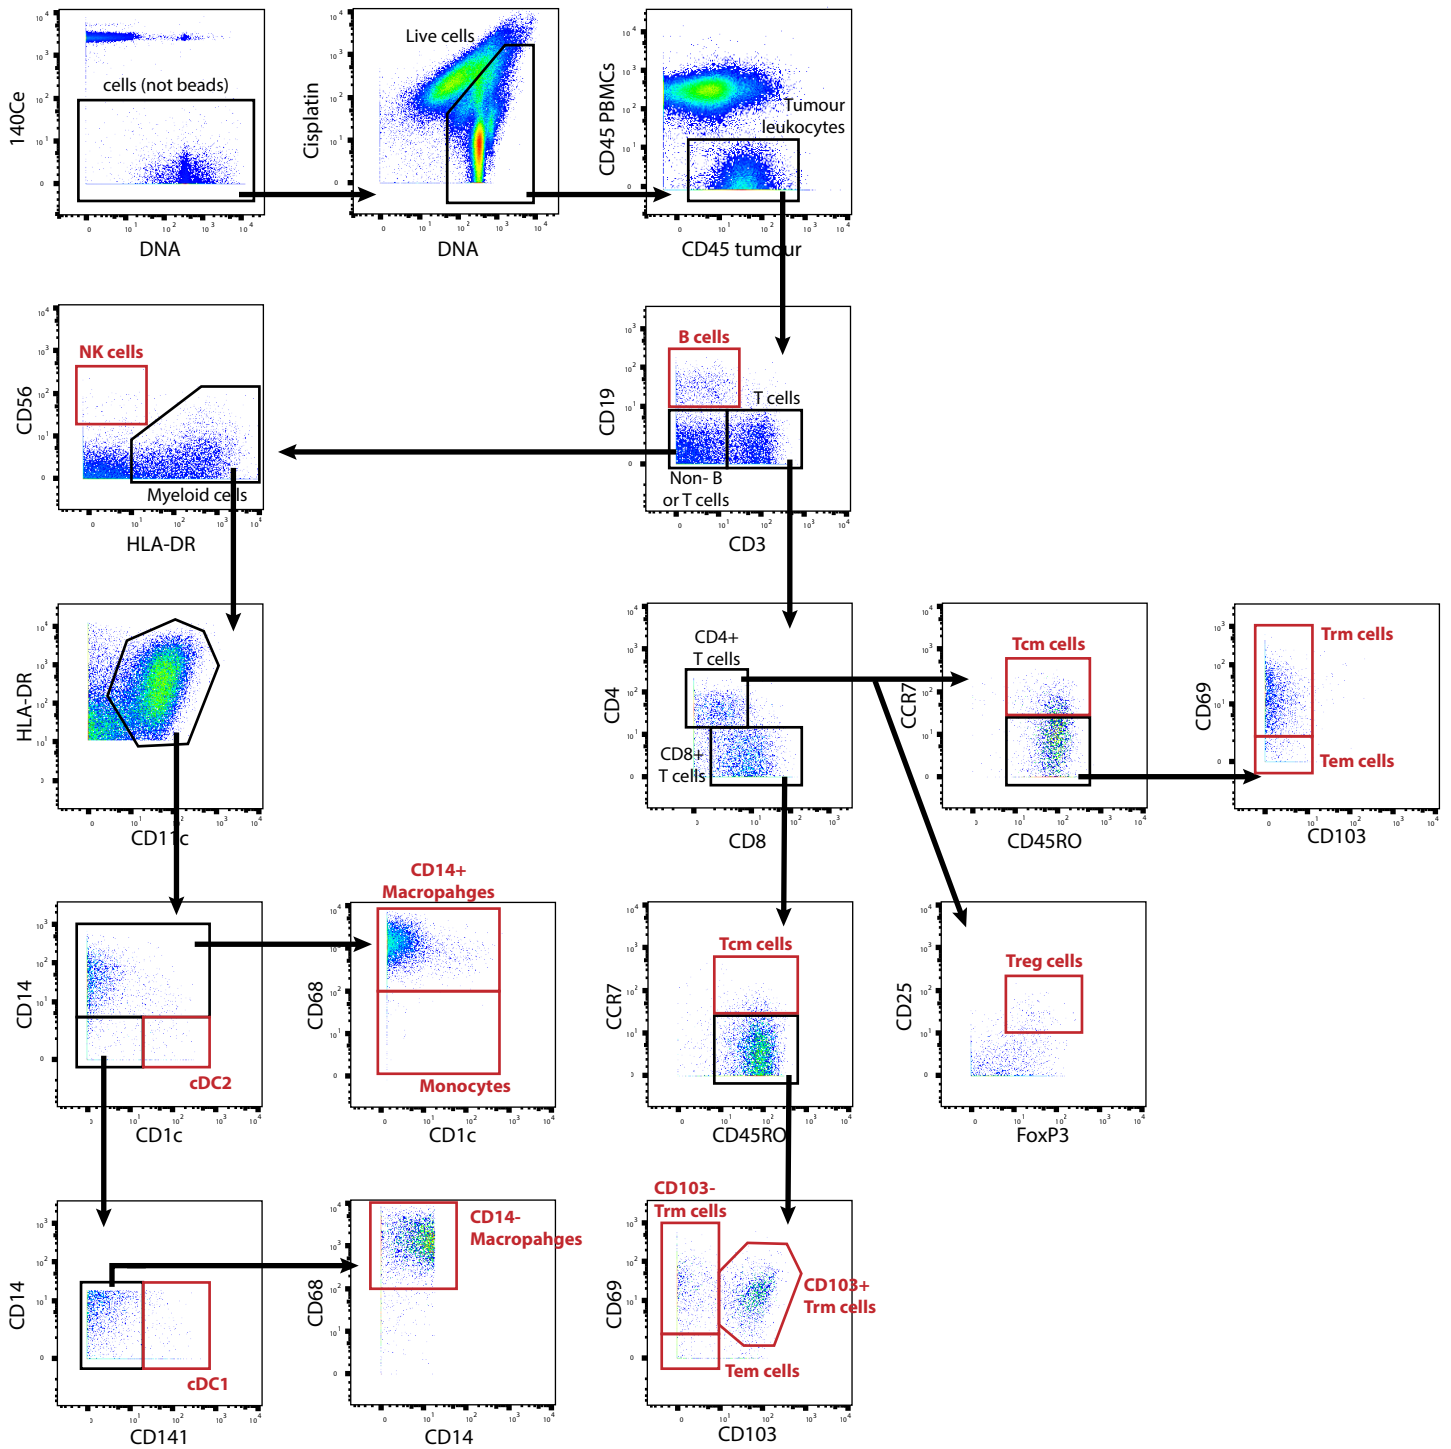

Supplement: 10780432ccr184011-sup-213505_2_supp_5330305_pmktvv.pdf [file 10780432ccr184011-sup-213505_2_supp_5330305_pmktvv.pdf]
